# Supplementary material
Source: PubMed Central journal article supplement (PMC4059825)
Supplement: NIHMS306407-supplement-1_si_001.pdf [file NIHMS306407-supplement-1_si_001.pdf]

Supporting Information for

Solid-State Nanostructured Materials from Self-  
Assembly of a Globular Protein-Polymer Diblock  
Copolymer

*Carla S. Thomas, Matthew J. Glassman, Bradley D. Olsen\**

Department of Chemical Engineering, Massachusetts Institute of Technology, 77 Massachusetts  
Avenue, Cambridge, Massachusetts 02139, United States

---

\* Email: [bdolsen@mit.edu](mailto:bdolsen@mit.edu)

Sequence of mutant mCherryS131C protein including the 6xHis tag:

MRGSHHHHHHGMVSKGEEDNMAIIKEFMRFKVMHEGSVNGHEFEIEGEGEGRPYEGTQTAK  
LKVTKGGPLPFAWDILSPQFMYGSKAYVKHPADIPDYKLSFPEGFKWERVMNFEDGGVVTV  
TQDSSLQDGEFIYKVKLKRGTNFPCDGPVMQKKTMGWEASSERMYPEDGALKGEIKQRLKDKD  
GGHYDAEVKTTYKAKKPVQLPGAYNVNIKLDITSHNEDYTIVEQYERAEGRHSTGGMDELYK

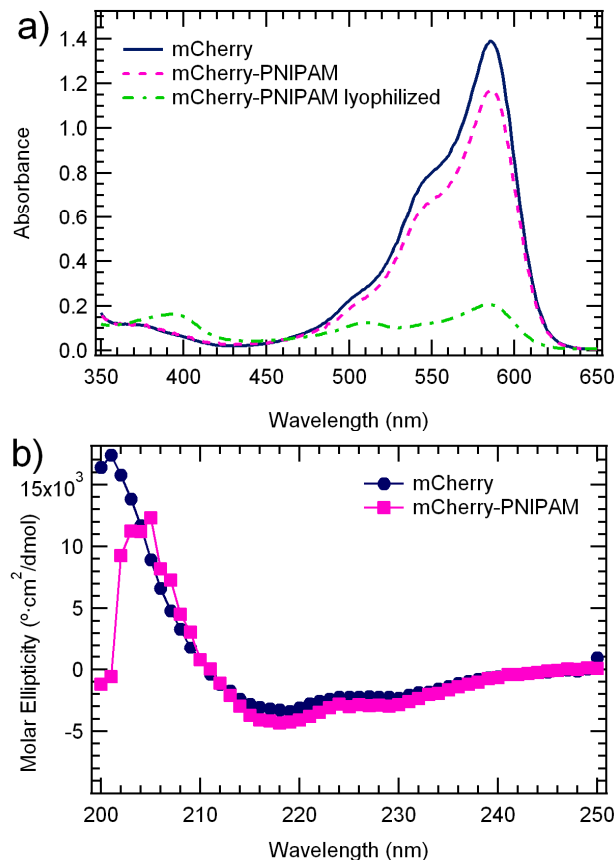

**Figure S1.** a) UV-vis spectra in solution show minimal change in mCherryS131C chromophore after conjugation to PNIPAM. The spectrum of the mutant mCherryS131C is quantitatively identical to that of the parent protein.<sup>1-2</sup> This is contrasted with the dramatic change observed after lyophilization. b) Circular dichroism spectra of mCherryS131C and its conjugate with PNIPAM in solution indicate the protein fold is not disrupted by conjugation.

| Sample              | Thermal Transition (°C) |
|---------------------|-------------------------|
| PNIPAM              | 33.5                    |
| mCherryS131C-PNIPAM | 38.6                    |

**Table S1.** Cloud points of mCherryS131C-PNIPAM and the corresponding homopolymer. Solutions were prepared at 1.26 mg/mL PNIPAM and the absorbance at 700 nm was monitored as the temperature was ramped from 20 to 50 °C at 0.1 °C/min. A PNIPAM molecular weight of 35.5 kg/mol was used for both conjugate and homopolymer measurements. Increasing PNIPAM molecular weight would decrease the transition temperatures.

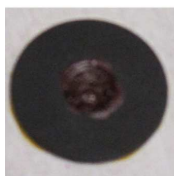

**Figure S2.** Photograph of mCherry-PNIPAM block copolymer sample cast at room temperature and used for SAXS data acquisition showing the deep red color of mCherry. The sample is 7 mm in diameter and approximately 0.5 mm in height.

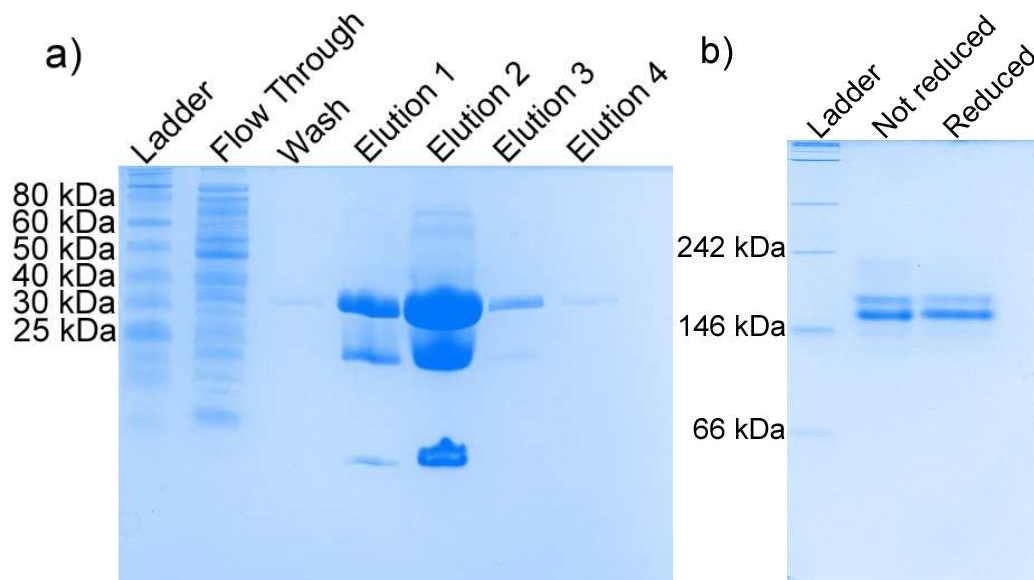

**Figure S3.** a) SDS PAGE denaturing gel showing mCherryS131C purity. The two smaller molecular weight segments are the result of the chromophore acylimine bond breaking during protein boiling. b) Native gel showing that mCherry remains intact throughout the purification process. A higher molecular weight band shows the presence of dimers formed through disulfide linkages; the dimers are more prevalent under non-reducing conditions. Reduced mCherry was obtained by adding an equimolar amount of  $\beta$ -mercaptoethanol and allowing the reaction to occur at room temperature for one hour.

**Table S2.** Quantitative analysis of circular dichroism spectra using CD Pro software.

| Sample                  | Method   | Fraction helix | Fraction sheet | Fraction turn | Fraction unordered | Average fraction helix | Average fraction sheet | Average fraction turn | Average fraction unordered |
|-------------------------|----------|----------------|----------------|---------------|--------------------|------------------------|------------------------|-----------------------|----------------------------|
| mCherryS131C            | CONTINLL | 0.057          | 0.503          | 0.183         | 0.257              | 0.041                  | 0.497                  | 0.192                 | 0.270                      |
|                         | SELCON3  | 0.071          | 0.501          | 0.142         | 0.286              |                        |                        |                       |                            |
|                         | CSDDTTR  | -0.004         | 0.486          | 0.251         | 0.267              |                        |                        |                       |                            |
| mCherryS131C-PNIPAM     | CONTINLL | 0.027          | 0.393          | 0.202         | 0.378              | -0.003                 | 0.433                  | 0.219                 | 0.351                      |
|                         | SELCON3  |                |                |               |                    |                        |                        |                       |                            |
|                         | CSDDTTR  | -0.033         | 0.473          | 0.235         | 0.325              |                        |                        |                       |                            |
| Room temperature cast   | CONTINLL | 0.021          | 0.394          | 0.198         | 0.386              | -0.067                 | 0.462                  | 0.224                 | 0.381                      |
|                         | SELCON3  | 0.026          | 0.436          | 0.204         | 0.334              |                        |                        |                       |                            |
|                         | CSDDTTR  | -0.248         | 0.557          | 0.271         | 0.421              |                        |                        |                       |                            |
| 40 C cast               | CONTINLL | 0.029          | 0.390          | 0.203         | 0.377              | 0.001                  | 0.428                  | 0.215                 | 0.356                      |
|                         | SELCON3  | -0.006         | 0.427          | 0.213         | 0.366              |                        |                        |                       |                            |
|                         | CSDDTTR  | -0.019         | 0.467          | 0.228         | 0.324              |                        |                        |                       |                            |
| 4 C anneal              | CONTINLL | 0.020          | 0.381          | 0.196         | 0.404              | -0.016                 | 0.413                  | 0.206                 | 0.396                      |
|                         | SELCON3  | -0.036         | 0.403          | 0.179         | 0.454              |                        |                        |                       |                            |
|                         | CSDDTTR  | -0.032         | 0.456          | 0.244         | 0.332              |                        |                        |                       |                            |
| Room temperature anneal | CONTINLL | 0.033          | 0.508          | 0.192         | 0.267              | 0.029                  | 0.480                  | 0.215                 | 0.276                      |
|                         | SELCON3  | 0.037          | 0.480          | 0.217         | 0.266              |                        |                        |                       |                            |
|                         | CSDDTTR  | 0.018          | 0.452          | 0.235         | 0.295              |                        |                        |                       |                            |

**Volume Fraction Calculation.** The volume fraction of PNIPAM in the mCherry-PNIPAM block copolymer was calculated using mCherry crystallographic data<sup>2</sup> along with a PNIPAM density<sup>3</sup> of 1.05 g/cm<sup>3</sup>. First, the mCherry density is calculated.

$$\rho = \frac{MW \cdot z}{V \cdot N_A}$$

The molar mass, MW, is 28,134.48 g/mol including the 6xHis tag. Z, the number of formula units per unit cell, is 3. N<sub>A</sub> is Avogadro's number, and the volume, V, is calculated using the dimensions of the unit cell.

$$V = a \cdot b \cdot c \cdot \sin(\beta)$$

where a = 4.876 nm, b = 4.285 nm, c = 6.106 nm, and β = 112.31°.

The volume fraction of PNIPAM is then calculated using the following formula:

$$\varphi_{PNIPAM} = \frac{\frac{MW_{PNIPAM}}{\rho_{PNIPAM}}}{\frac{MW_{PNIPAM}}{\rho_{PNIPAM}} + \frac{MW_{mCherry}}{\rho_{mCherry}}}$$

1. Shaner, N. C.; Campbell, R. E.; Steinbach, P. A.; Giepmans, B. N. G.; Palmer, A. E.; Tsien, R. Y. Improved Monomeric Red, Orange and Yellow Fluorescent Proteins Derived from *Discosoma* sp. Red Fluorescent Protein. *Nat. Biotechnol.* **2004**, *22*, 1567-1572.
2. Shu, X. K.; Shaner, N. C.; Yarbrough, C. A.; Tsien, R. Y.; Remington, S. J. Novel Chromophores and Buried Charges Control Color in mFruits. *Biochemistry* **2006**, *45*, 9639-9647.
3. Zhang, L.; Daniels, E. S.; Dimonie, V. L.; Klein, A. Synthesis and Characterization of PNIPAM/PS Core/Shell Particles. *J. Appl. Polym. Sci.* **2010**, *118*, 2502-2511.
